# 1 Scabies epidemiology in health care centers for refugees and 2 asylum seekers in Greece

3 **Christina Louka<sup>1,2\*#</sup>, Emmanouil Logothetis<sup>3</sup>, Daniel Engelman<sup>4,5,6</sup>, Eirini  
4 Samiotaki Logotheti<sup>7</sup>, Spyros Pournaras<sup>8</sup>, Ymkje Stienstra<sup>1,2,9</sup>**

5 1. Department of Internal Medicine/Infectious Diseases, University of Groningen,  
6 University Medical Center Groningen, , Groningen, The Netherlands

7 2. ESCMID study group for infections in travelers and migrants, Switzerland

8 3. Department of Reception of Asylum Seekers, Ministry of Migration and Asylum,  
9 Athens, Greece

10 4. Tropical Diseases Group, Murdoch Children's Research Institute, Melbourne, Victoria,  
11 Australia

12 5. Department of Paediatrics, University of Melbourne, Melbourne, Victoria, Australia

13 6. Melbourne Children's Global Health, The Royal Children's Hospital, Melbourne,  
14 Victoria, Australia

15 7. Department of Mobile Population, Section of Preparedness and Response, National  
16 Public Health Organization, Athens, Greece

17 8. Laboratory of Clinical Microbiology, 'ATTIKON' University Hospital, School of Medicine,  
18 National and Kapodistrian University of Athens, Athens, Greece

19 9. Department of Clinical Sciences, Liverpool School of Tropical Medicine, Liverpool,  
20 United Kingdom

21 \*Corresponding author

22 E-mail: [c.louka@umcg.nl](mailto:c.louka@umcg.nl) (CL)

NOTE: This preprint reports new research that has not been certified by peer review and should not be used to guide clinical practice.

- 23           #Current address: Department of Microbiology, Tzaneio General Hospital of Piraeus,  
24           Athens, Greece

## 26 Abstract

27 **Background.** Scabies is a global health concern disproportionately affecting vulnerable  
28 population such as refugees and asylum seekers. Greece is a main geographical point of entry  
29 in Europe for refugees, but epidemiological data on scabies in this population is scarce. We  
30 aimed to evaluate the epidemiology of scabies, including trends over the study period.

31 **Methodology/Principal findings.** Data were collected from June, 2016 to July, 2020, using the  
32 surveillance system of the Greek National Public Health Organization. Staff at health centers  
33 for refugees/asylum seekers compiled daily reports on scabies and other infectious diseases.  
34 Observed proportional morbidity for scabies was calculated using consultations for scabies as  
35 a proportion of total consultations.

36 There were a total of 13118 scabies cases over the study period. Scabies was the third most  
37 frequently observed infectious disease in refugees/asylum seekers population after  
38 respiratory infections and gastroenteritis without blood in the stool. The scabies monthly  
39 observed proportional morbidity varied between 0.3% (August 2017) to 5.6% (January 2020).  
40 Several outbreaks were documented during the study period. An increasing number of cases  
41 was observed from October 2019 until the end of the study period, with a peak of 1663 cases  
42 in January 2020, related to an outbreak at one center. Spearman correlation test between the  
43 number of reported scabies cases and time confirmed an increasing trend ( $\rho=0.67$ ).

44 **Conclusions/Significance.** Scabies is one of the most frequently reported infectious diseases  
45 by health care workers in refugee/asylum seekers centers in Greece. Consultations for scabies  
46 increased over time and there were several outbreaks. The current surveillance system  
47 effectively detects new cases in an early stage. Public health interventions, including mass

48 drug administration, should be considered to reduce the burden of scabies in refugee/migrant  
49 populations.

## 50 **Author summary**

51  
52 Scabies is a skin disease caused by ectoparasitic mite *Sarcoptes scabiei* var. *hominis*. A person  
53 infected by scabies manifests symptoms like itching and skin rash, while the most complicated  
54 forms of the infection can lead to bacterial infections and sepsis. Scabies is a global health  
55 concern and as of 2017, it is officially included in the portfolio of conditions prioritized by the  
56 Department of Neglected Tropical Diseases, according to the World Health Organization.  
57 Furthermore, scabies can disproportionally affect vulnerable population, such as refugees  
58 and asylum seekers. Greece is one of the main points of entry in Europe for refugees.  
59 However, the prevalence of scabies amongst refugees in Greece has not been thoroughly  
60 investigated. In this study, we utilized data weekly reported within the epidemiological  
61 surveillance in refugees/asylum seekers centers of the Greek National Public Health  
62 Organization, in order to obtain a clear overview of scabies epidemiology and identify any  
63 trends over time. Our findings confirmed the high prevalence of scabies among refugees and  
64 identified a clear trend of significant increase over time. Further public health interventions,  
65 like mass drug administration could help restrain the dissemination of the disease and lower  
66 its burden among refugees.

67

68

## 69 Introduction

70 Scabies is a skin disease caused by infestation with ectoparasitic mite *Sarcoptes scabiei* var.  
71 *hominis*. The main clinical manifestations include mild to severe itching and a skin rash  
72 consisting of small papules, nodules and vesicles. Scabies can be further complicated, leading  
73 to secondary bacterial skin infections, invasive bacterial infections, and sepsis [1].

74 Scabies is a global health concern affecting an estimated 200 million people worldwide. It is  
75 endemic in many low- and middle-income countries, particularly those with hot, tropical  
76 climates, and it disproportionally affects children and vulnerable population [2,3].  
77 Overcrowded conditions, low income and limited access to treatment are factors associated  
78 with increased prevalence. In 2017, the World Health Organization officially included scabies  
79 in the portfolio of conditions prioritized by the Department of Neglected Tropical Diseases.

80 Ongoing armed conflict, political turmoil and financial instability has led to an increased influx  
81 of asylum seekers and refugees into Europe [4]. Several studies have demonstrated the  
82 increased prevalence of scabies amongst asylum seeker populations in Europe [5-7]. Greece  
83 is a major geographical point of entry for refugees, mainly originating from Afghanistan, Syria,  
84 Iraq, and the African continent. According to the United Nations High Commissioner for  
85 Refugees, approximately 1.2 million refugees have entered Greece through sea or mainland,  
86 from beginning of 2015 until end of June of 2021 [8]. After their arrival, refugees are  
87 appointed in designated centers located on several Aegean islands and the Greek mainland.

88 Specialized medical personnel are appointed in Points of Care (PoC) within refugees/asylum  
89 seekers centers and are responsible for the healthcare, medical examination and subsequent  
90 treatment of the refugees/asylum seekers. The National Public Health Organization (NPHO)

91 provides directions and instructions for the management of a range of communicable  
92 diseases, including scabies to medical personnel. For scabies, instructions cover the detection,  
93 treatment, individual and environmental preventive measures, and management of scabies  
94 outbreaks [9].

95 Scabies is not a mandatory reportable disease for general population in Greece. Nevertheless,  
96 surveillance amongst refugees/asylum seekers in PoC is conducted by the NPHO. Clinical  
97 scabies cases are documented throughout the country and reported on a weekly basis within  
98 the surveillance system for PoC. However, epidemiological data regarding scabies in refugees  
99 and asylum seekers in Greece is scarce. We aimed to evaluate the epidemiology of scabies in  
100 refugees/asylum seekers centers in Greece, to investigate changes over time and factors  
101 relating to these changes and to compare the epidemiology of scabies with other reported  
102 infectious diseases.

## 103 **Methods**

### 104 **Identification and assessment of refugees/asylum seekers**

105 Refugees/asylum seekers may enter Greece by sea or land. As soon as practicable after arrival,  
106 NPHO personnel conduct an initial, preliminary medical examination and identify those in  
107 need of immediate medical assistance and/or hospital admission. Medically stable  
108 refugees/asylum seekers complete registration and identification procedures and are  
109 relocated to one of thirty-nine Regional Units [10]. These include six 'Reception and  
110 Identification Centers', located across the sea and land borders, where newly arrived refugees  
111 are documented and identified. Thirty-one 'Facilities of Temporary Reception' where  
112 refugees are relocated whilst undertaking in the process of seeking asylum, are on the Greek

113 mainland (Figure 1). When the criteria to apply for asylum are not met, people may remain  
 114 within refugees/asylum seekers centers for a prolonged period of time, until their situation is  
 115 reevaluated.

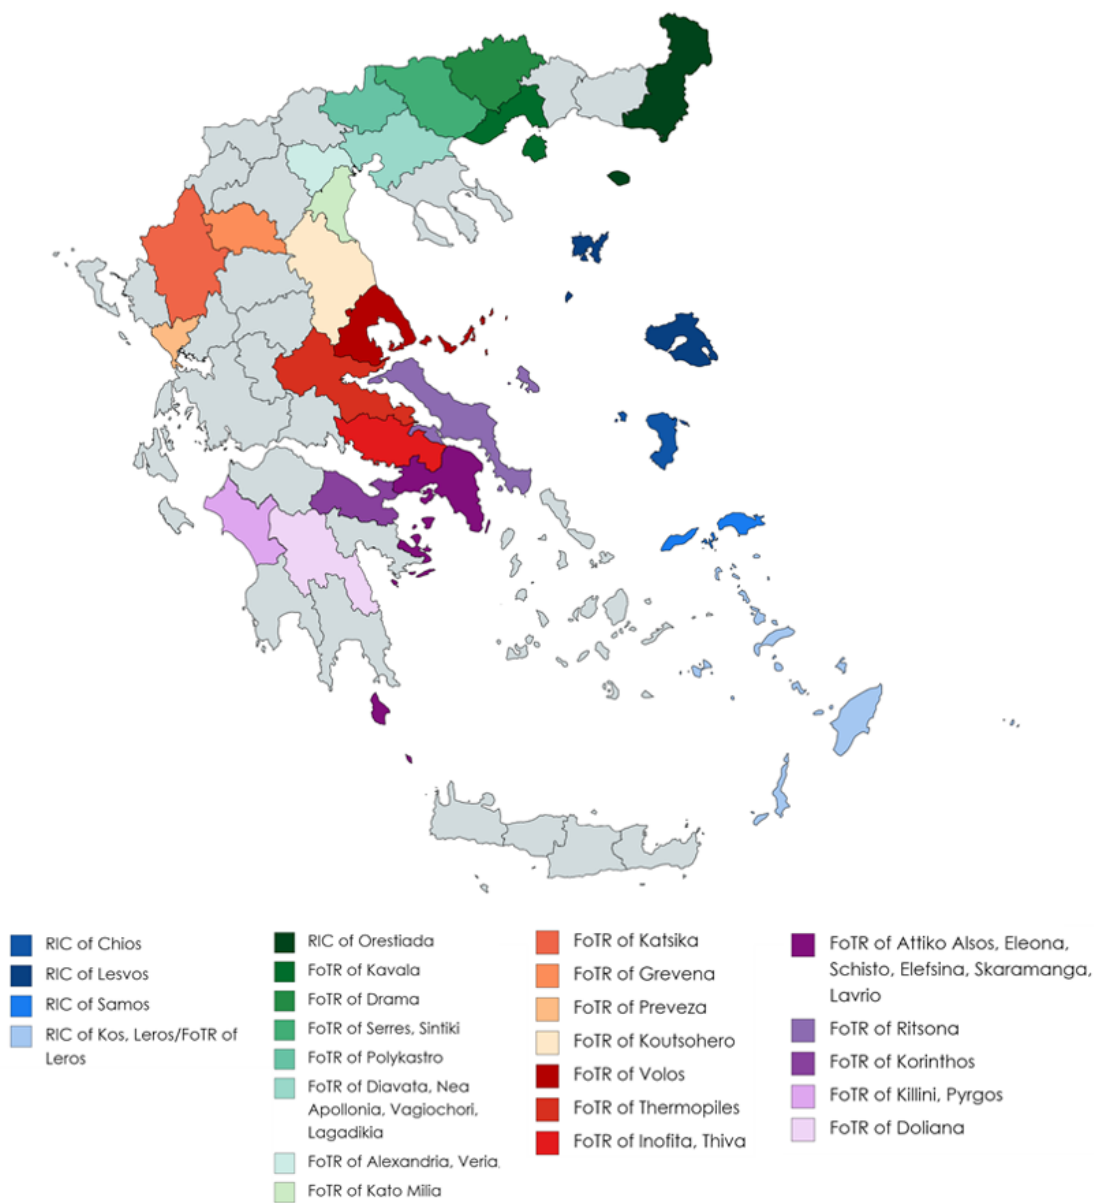

116

117 **Figure 1. Geographic locations of Regional Units in Greece, as of November 2020.**

118 RIC= Reception and Identification Centers, FoTR= Facilities of Temporary Reception.

119 Map created using MapChart (available from: <https://mapchart.net/index.html>)

## 120 **Scabies diagnosis**

121 Diagnosis of scabies in PoC for refugees/asylum seekers of the NPHO is based on clinical skin  
122 examination, symptoms, and contact history. No laboratory confirmation is performed. This  
123 diagnosis is similar to the diagnosis of “Clinical Scabies,” in the consensus criteria developed  
124 by the International Alliance for the Control of Scabies in 2020 [11], although these criteria  
125 were not used specifically in this study.

## 126 **Data collection**

127 Data was collected through the NPHO surveillance system in PoC for refugees/asylum  
128 seekers. PoC for refugees/asylum seekers include different health care facilities providing  
129 medical care within the refugees/asylum seekers centers and/or within hospitals and public  
130 primary care health facilities and serve as the first line of care for the people residing within  
131 the centers. NPHO systematically monitors 14 defined syndromes or health conditions,  
132 including respiratory infection with fever, gastroenteritis without blood in the stool,  
133 gastroenteritis with blood in the stool, rash with fever, clinical scabies, pulmonary  
134 tuberculosis, malaria with positive rapid diagnostic test, diphtheria, meningitis and/or  
135 encephalitis, hemorrhagic manifestations with fever and sepsis or septic shock.

136 Cumulative data is collected and sent daily from the participating PoC for refugees/asylum  
137 seekers. Data is collected by doctors, nurses and other health professionals working at the  
138 refugees/asylum seekers centers and Non-Governmental Organizations staffing primary care  
139 facilities. Participation rate (i.e., the number of centers sending data to NHPO), differs on a  
140 weekly basis. After analysis, detailed data is published in weekly reports online [12]. No



141 individual clinical data is collected or published. The total population of refugees/asylum  
142 seekers at each center, and over time, is not reported.

### 143 **Treatment and management of scabies**

144 Treatment instructions and medication supplies for scabies are under the authority of the  
145 Vector-mediated Diseases department of the NPHO. All treatment and infection control  
146 measures are implemented in collaboration with the NPHO, the Ministry of Migration and  
147 Asylum and other organizations responsible for refugee/migrant health care.

148 Treatment is administered to all suspected scabies cases and their close contacts. NPHO  
149 recommends application of benzyl benzoate lotion for adults and older children and  
150 precipitated sulfur vaseline for infants, young children and pregnant women. Dosages and  
151 duration of treatment differs per case according to the treating doctor's assessment.  
152 Prophylactic mass administration of ivermectin or any other scabies treatment is not currently  
153 used systematically in the refugee/asylum seekers centers, but has been used to control  
154 outbreaks and/or clusters.

155 In addition, along with the administration of the medication for scabies, NPHO proposes a  
156 bundle of environmental measures. Use of clean clothes and bed sheets is recommended  
157 after, at least, the first two applications of the treatment. Clothes and bed sheet should be  
158 washed at high temperatures and thoroughly dried afterwards. When this is not feasible,  
159 clothes and bed sheets should be enclosed in a bag for seven days. Thorough cleaning of the  
160 living area with standard cleaning detergents is recommended but sterilization of the living  
161 environment or application of insecticides is not recommended.

162

## 163 **Statistical analysis**

164 Data were analyzed by month for the period June 2016 to July 2020. The proportional  
165 morbidity for scabies was calculated as the proportion of cases of scabies compared to total  
166 consultations for all infective causes. The number of cases and proportional morbidity for  
167 four other syndromes (gastroenteritis without blood in the stool, respiratory infections,  
168 tuberculosis, and rash with fever) were also analyzed, to provide an overview of the health  
169 status of the population over time and a comparison for the trends of scabies cases.  
170 Descriptive analyses were performed using Microsoft Excel. Spearman correlation test was  
171 performed, using RStudio and R for Windows 4.0.2, to investigate scabies cases through time.

## 172 **Ethics**

173 All data included in the study are publicly available through the official site of NPHO and do  
174 not include identifiable information. The study was approved by the Greek NPHO (ΚΠ  
175 22069/2020-19/10/2020).

## 176 **Results**

177 Data was collected through the system of epidemiological surveillance in PoC for  
178 refugees/asylum seekers of NPHO from June 20, 2016 to July 26, 2020, with the exception  
179 only of week 29 of 2017, for which no data were available (in total, 213 weeks of data were  
180 included). The number of refugees/asylum seekers centers sending data to the  
181 epidemiological surveillance system differed per week. The median weekly response rate was  
182 95.2% (40 out of 42 PoC), with a minimum of 68% (week 52, 2018, 17 out of 25 PoC). There  
183 was a complete response (100%) for 53 weeks of the study.

184 In total, 1054807 consultations were documented for all causes. The median number of  
185 consultations, per month, was 19560 ( IQR 17274 – 23549, Figure 2).

186

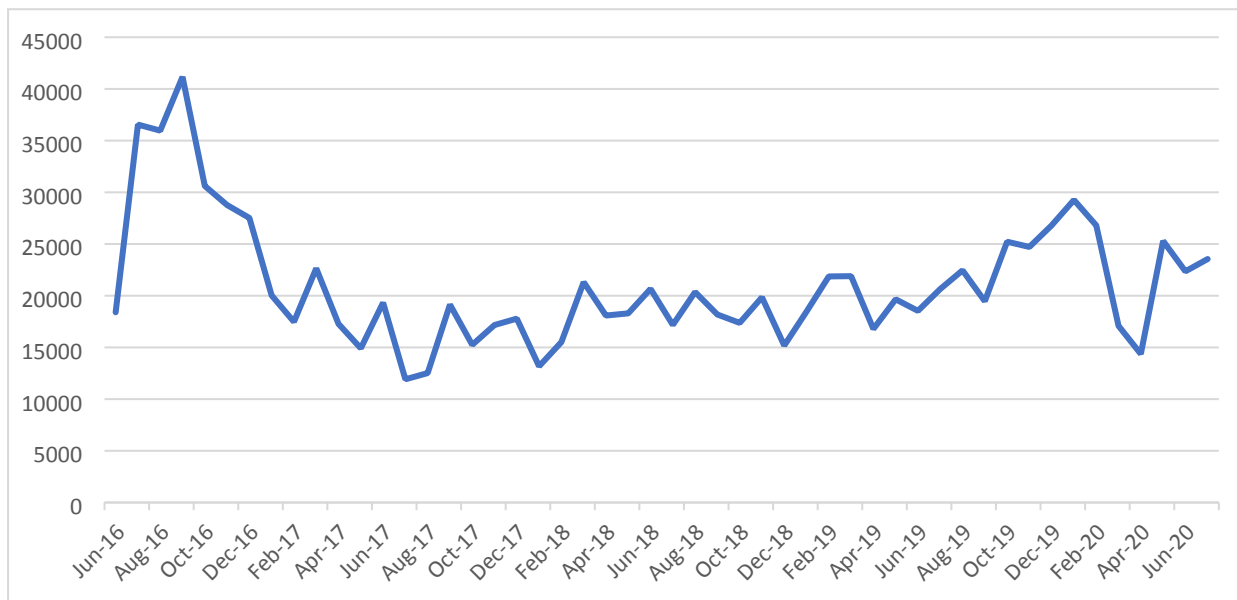

187

188 **Figure 2.** Total reported consultations at the centers hosting refugees/asylum seekers, for all  
189 causes, per month.

## 190 Scabies epidemiology

191 A total of 13118 consultations with clinical scabies were reported over the study period  
192 (median 176, IQR 117 – 292, Figure 3). A maximum number of 1663 cases was observed in  
193 January 2020, related to a large outbreak.

194

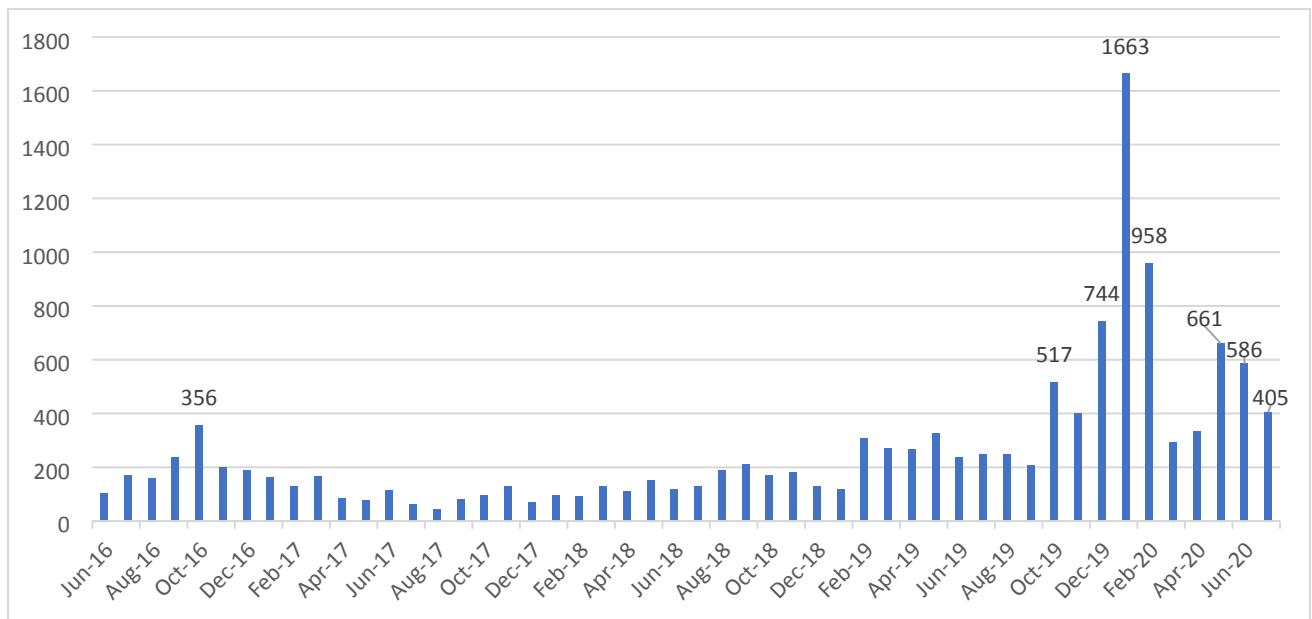

195

196 **Figure 3.** Number of consultations for clinical scabies reported by centers hosting  
197 refugees/asylum seekers, per month.

198 Although scabies cases fluctuated throughout the study period, the number of cases  
199 significantly increased from October 2019 until the end of the study period, with a peak of  
200 1663 cases in January 2020. Spearman correlation test between reported scabies cases and  
201 time confirmed an increasing trend over the study period and a strong correlation between  
202 the two variables ( $R=0.67$ , Figure 4). The correlation remained strong ( $R=0.65$ ) even after  
203 removing the January 2020 peak.

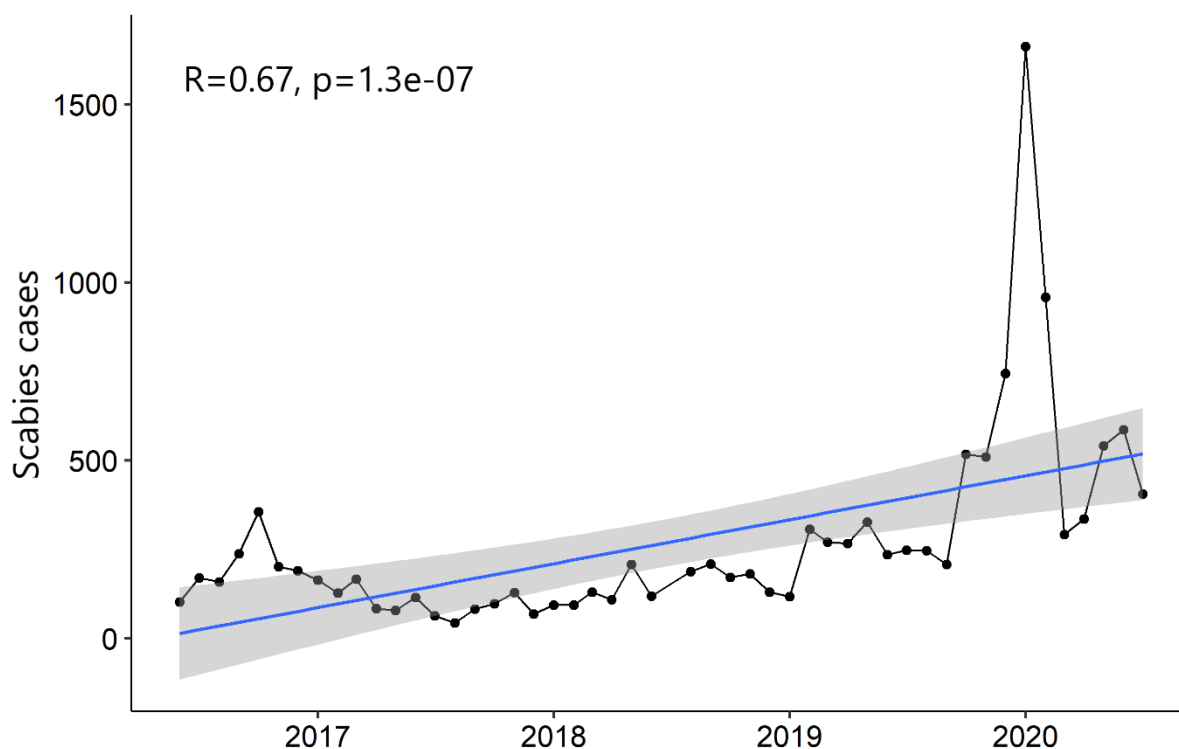

204

205 **Figure 4.** Trend of reported scabies cases during the time of the study period, including all  
206 data.

207

208 The proportion of consultations with scabies varied from 0.3% in August 2017 to 5.6 % in  
209 January 2020. The number of consultations for clinical scabies cases compared to other  
210 syndromes is shown in Figure 5. Respiratory infections, gastroenteritis without blood and  
211 scabies were the most frequent causes for consultations amongst the syndromes included in  
212 the NHPO epidemiological surveillance system. The observed peaks in consultations for these  
213 syndromes did not follow a specific seasonal pattern. However, consultations numbers  
214 peaked during the summer of 2016 and winter of 2020. The number of suspected  
215 tuberculosis cases remained relatively low throughout the study period.

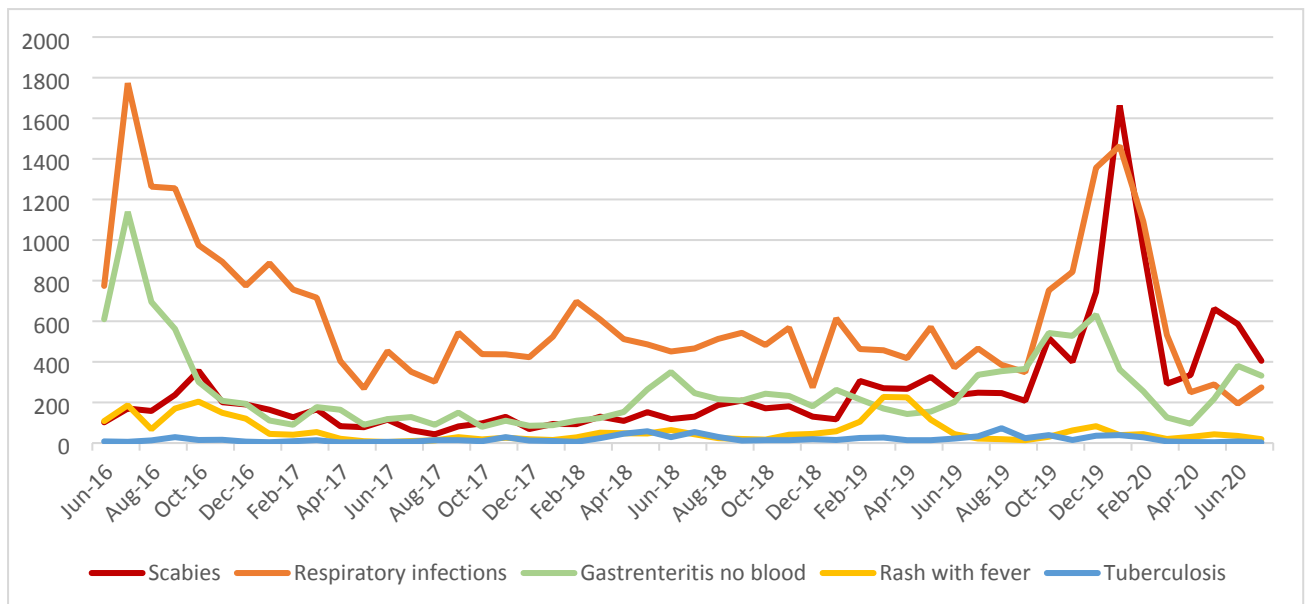

216

217 Figure 5. Number of consultations for clinical cases of scabies as compared to the four most  
218 common reported infectious diseases\*, at the PoC, per month.

219 \*gastroenteritis without blood in the stool, respiratory infections, tuberculosis, rash with  
220 fever.

## 221 Discussion

222 To our knowledge, this is the first study to investigate the epidemiology of scabies in the  
223 refugees/asylum seekers populations in Greece. Clinical scabies cases were documented for  
224 a four-year period from PoC for refugees/asylum seekers in Greece, with a very high average  
225 surveillance response rate.

226 Our study demonstrated that clinical scabies is a commonly reported infectious disease in this  
227 population. Scabies cases were reported from refugees/asylum seekers centers every week,  
228 and the number of consultations increased over the study period.

229 The increased number of clinical scabies cases during the first few weeks of 2020 is related to  
230 an outbreak of scabies observed in a PoC in a refugees/asylum seeker center. The specific

231 center reported approximately 80% of the total scabies cases that month, mainly regarding  
232 newly arrived refugees, who manifested clinical symptoms before their arrival at the center  
233 [13].

234 Scabies is a major burden amongst vulnerable populations such as refugees/asylum seekers.  
235 Refugees/asylum seekers often live in crowded conditions throughout their transnational  
236 migrating route, increasing the transmission of scabies. In a 2020 study, regarding rescued  
237 people by non-governmental organization Open Arms in the Central Mediterranean, scabies  
238 was the most frequent infectious disease observed, accounting for 96% of total infectious  
239 diseases diagnoses [14]. Another study from Germany investigated infectious diseases among  
240 a cohort of unaccompanied refugee minors, and found scabies to be the most frequent  
241 infectious disease, affecting 14.2% of minors [15]. Furthermore, a systematic review that  
242 assessed the infectious disease profiles of Syrian and Eritrean migrants in Europe, found a  
243 high prevalence of scabies, up to 80% prevalence in the Eritrean migrants [16]. Patients with  
244 scabies, particularly children have to deal with the burden of the disturbing symptoms of the  
245 disease [17].

246 We report a very high burden of scabies among the refugees/asylum seekers population in  
247 Greece, with cases reported throughout the study period. Scabies was the third most frequent  
248 infectious disease, included in the systematically reported to NPHO syndromes. At specific  
249 time points, namely January 2020 and May-July 2020, scabies was the single most frequent  
250 reported infectious disease. Outbreaks of scabies cases coincided with peaks in other  
251 infectious diseases, with the most prominent example in January of 2020. A possible  
252 explanation could be an increase of the refugees/asylum seekers residing in the centers at  
253 the specific time points, the crowded conditions within the centers and/or seasonality of

254 infectious diseases. No information is available on how many cases were complicated leading  
255 to secondary bacterial infections.

256 The rapid turnover of populations in the refugees/asylum seekers centers predisposes to  
257 reinfestations and outbreaks of scabies. A study from the Netherlands described mass drug  
258 administration of ivermectin/permethrin in Eritrean and Ethiopian refugees with a high  
259 prevalence of scabies. The number of reinfestations and the number of complicated forms of  
260 scabies reduced after mass drug administration [18]. Population-level mass drug  
261 interventions, particularly with oral ivermectin, can be more effective than individual case  
262 management, especially if scabies prevalence is over 5- 10% [19]. Currently, in Greece, mass  
263 administration for prevention of scabies in refugees/asylum seekers is not implemented.  
264 Considering the increasing caseload of scabies and the crowded living conditions, mass drug  
265 administration, targeting newly-arrived refugees/asylum seekers may be an effective  
266 strategy. The current NPHO surveillance and response system could then act to detect and  
267 manage new cases and any emerging outbreaks in a timely and effective manner.

268 It is possible that infection control measures aiming to reduce the transmission of the SARS-  
269 CoV-2 virus may have influenced the number of consultations for infectious diseases under  
270 surveillance after March of 2020 [20,21]. However, respiratory and gastroenteritis infections  
271 cases in 2020 followed a similar pattern to the previous years, possibly reflecting the  
272 challenges with implementing social distancing in these refugee/asylum seekers centers.

273 Continuous, systematic data collection within the system of epidemiological surveillance in  
274 PoC for refugees/asylum seekers and subsequent publication by NPHO, provided valuable  
275 information on infectious diseases prevalence among the specific population allowing earlier  
276 interventions. Data were collected from a large number of PoC with wide geographical



277 distribution, reflecting clear overview of scabies epidemiology in refugees/asylum seekers  
278 population in centers.

279 This study has several limitations. Data on complications of scabies, therapeutic adherence,  
280 clinical outcomes or reinfestation of scabies in Greece are not systematically documented and  
281 were therefore not available to include. Furthermore, demographic characteristics of the  
282 refugees/asylum seekers are not available, hence reported scabies cases could not be related  
283 to the country of origin. This study included only the scabies patients who visited the health  
284 care facilities. Therefore, the number of scabies included in our reports is likely to be an  
285 underestimation of the actual burden of scabies in the refugee centers.

## 286 **Conclusion**

287 Scabies is one of the most frequent reported infectious diseases among the refugees/asylum  
288 seekers population in Greece. The number of consultations due to scabies increased over the  
289 period 2016 to 2020. National systematic reporting of scabies by health personnel working in  
290 PoC can enable early interventions in order to reduce the burden of scabies and its  
291 complications. As the incidence increases and living conditions complicate optimal treatment  
292 of individual patients, mass drug administration may prove to be a necessary intervention to  
293 reduce the burden of scabies in refugees/asylum seekers population.

## 294 **Acknowledgements**

295 We would like to acknowledge all medical staff responsible for refugees/asylum seekers  
296 health care at the Regional Units in Greece that contributed to the documentation and report

297 of the data at the NPHO. Furthermore, we would like to thank the corresponding departments  
298 of NHPO that gave us access to relevant information.

299

## 300 **References**

- 301 1. Thomas C, Coates SJ, Engelman D, Chosidow O, Chang AY. Ectoparasites: Scabies. *J Am*  
302 *Acad Dermatol.* 2020;82(3):533-548. doi:10.1016/j.jaad.2019.05.109
- 303 2. WHO. Fact sheets. Scabies [cited 4 January 2022].
- 304 3. Available from: <https://www.who.int/news-room/fact-sheets/detail/scabies>
- 305 3. Hay RJ, Steer AC, Engelman D, Walton S. Scabies in the developing world--its  
306 prevalence, complications, and management. *Clin Microbiol Infect.* 2012  
307 Apr;18(4):313-23. doi: 10.1111/j.1469-0691.2012.03798.x
- 308 4. IOM (2017) 'Migration and Migrants: Regional Dimensions and Developments' in IOM  
309 (2017), World Migration Report 2018, IOM: Geneva.
- 310 Available from:
- 311 [https://publications.iom.int/system/files/pdf/wmr\\_2018\\_en\\_chapter3.pdf](https://publications.iom.int/system/files/pdf/wmr_2018_en_chapter3.pdf)
- 312 5. Kühne A, Gilsdorf A. Infectious disease outbreaks in centralized homes for asylum  
313 seekers in Germany from 2004-2014. *Bundesgesundheitsblatt Gesundheitsforschung*  
314 *Gesundheitsschutz.* 2016 May;59(5) 570-577. (doi:10.1007/s00103-016-2332-9)
- 315 6. Katsarou A, Armenaka M, Kosmadaki M, Lagogianni E, Vosynioti V, Tagka A, et al. Skin  
316 diseases in Greek and immigrant children in Athens. *Int J Dermatol.* 2012  
317 Feb;51(2):173-7. doi: 10.1111/j.1365-4632.2011.04948.x

- 318 7. Di Meo E, Di Napoli A, Amato LM, Fortino A, Costanzo G, Rossi A, et al. Infectious and  
319 dermatological diseases among arriving migrants on the Italian coasts. Eur J Public  
320 Health. 2018 Oct 1;28(5):910-916. doi: 10.1093/eurpub/cky126
- 321 8. United Nations High Commissioner for Refugees. Operational data portal.  
322 Mediterranean situation. Greece [cited 20 December 2020]  
323 Available from: <https://data2.unhcr.org/en/situations/mediterranean/location/5179>
- 324 9. National Public Health Organization. Scabies. Prevention and response measures in  
325 crowded conditions [cited 20 December 2020].  
326 Available from:  
327 [https://eody.gov.gr/wp-content/uploads/2019/05/Scabies\\_protocol\\_2020.pdf](https://eody.gov.gr/wp-content/uploads/2019/05/Scabies_protocol_2020.pdf)
- 328 10. Map of refugee/migrants camps in Greek mainland and islands. Google maps [cited  
329 20 December 2020]  
330 Available from: <http://www.bit.ly/greececamps>
- 331 11. Engelman D, Yoshizumi J, Hay RJ, Osti M, Micali G, Norton S, et al. The 2020  
332 International Alliance for the Control of Scabies Consensus Criteria for the Diagnosis  
333 of Scabies. Br J Dermatol. 2020 Nov;183(5):808-820. doi: 10.1111/bjd.18943.
- 334 12. National Public Health Organization. System of epidemiological surveillance in points  
335 of care for refugees/migrants [cited 20 December 2020]  
336 Available from: <https://eody.gov.gr/en/epidemiological-statistical-data/system-of-epidemiological-surveillance-in-points-of-care-for-refugees-migrants/>
- 337  
338 13. National Public Health Organization. System of epidemiological surveillance in points  
339 of care for refugees/migrants. Weekly Report. Week 2/2020 (06/01 to 12/01)

- 340 Available from: [https://eody.gov.gr/wp-content/uploads/2020/01/Surveillance-](https://eody.gov.gr/wp-content/uploads/2020/01/Surveillance-refugees-weekly-EN-2020-02.pdf)  
341 [refugees-weekly-EN-2020-02.pdf](https://eody.gov.gr/wp-content/uploads/2020/01/Surveillance-refugees-weekly-EN-2020-02.pdf)
- 342 14. Cañardo G, Gálvez J, Jiménez J, Serre N, Molina I, Bocanegra C. Health status of rescued  
343 people by the NGO Open Arms in response to the refugee crisis in the Mediterranean  
344 Sea. *Confl Health*. 2020;14:21. doi:10.1186/s13031-020-00275-z
- 345 15. Janda A, Eder K, Fressle R, Geweniger A, Diffloth N, Heeg M, et al. Comprehensive  
346 infectious disease screening in a cohort of unaccompanied refugee minors in Germany  
347 from 2016 to 2017: A cross-sectional study. *PLoS Med*. 2020 Mar 31;17(3):e1003076.  
348 doi: 10.1371/journal.pmed.1003076
- 349 16. Isenring E, Fehr J, Gültekin N, Schlagenhaut P. Infectious disease profiles of Syrian and  
350 Eritrean migrants presenting in Europe: A systematic review. *Travel Med Infect Dis*. 2018  
351 Sep-Oct;25:65-76. doi: 10.1016/j.tmaid.2018.04.014
- 352 17. Louka C, Chandler E, Ranchor AV, Broer H, Pournaras S, Ravensbergen SJ, et al. Asylum  
353 seekers' perspectives on vaccination and screening policies after their arrival in Greece  
354 and The Netherlands. *PLoS One*. 2019 Dec 26;14(12):e0226948. doi:  
355 10.1371/journal.pone.0226948
- 356 18. Beeres DT, Ravensbergen SJ, Heidema A, Cornish D, Vonk M, Wijnholds LD, et al.  
357 Efficacy of ivermectin mass-drug administration to control scabies in asylum seekers in  
358 the Netherlands: A retrospective cohort study between January 2014 - March 2016.  
359 *PLoS Negl Trop Dis*. 2018 May 17;12(5):e0006401. doi: 10.1371/journal.pntd.0006401
- 360 19. Engelman D, Cantey PT, Marks M, Solomon AW, Chang AY, Chosidow O, et al. The  
361 public health control of scabies: priorities for research and action. *Lancet*. 2019 Jul  
362 6;394(10192):81-92. doi: 10.1016/S0140-6736(19)31136-5

- 363 20. Galvin CJ, Li YJ, Malwade S, Syed-Abdul S. COVID-19 preventive measures showing an  
364 unintended decline in infectious diseases in Taiwan. *Int J Infect Dis.* 2020 Sep;98:18-20.  
365 doi: 10.1016/j.ijid.2020.06.062
- 366 21. Lee HH, Lin SH. Effects of COVID-19 Prevention Measures on Other Common  
367 Infections, Taiwan. *Emerg Infect Dis.* 2020 Oct;26(10):2509-2511. doi:  
368 10.3201/eid2610.203193
